# Supplementary material for: Recombinant prion protein induces a new transmissible prion disease in wild-type animals
Source: PubMed Central journal article supplement — Acta Neuropathol. 2010 Jan 6;119(2):177–87. doi: 10.1007/s00401-009-0633-x (PMC2808531; doi:10.1007/s00401-009-0633-x), 2010-01-06

Suppl. Figure 1

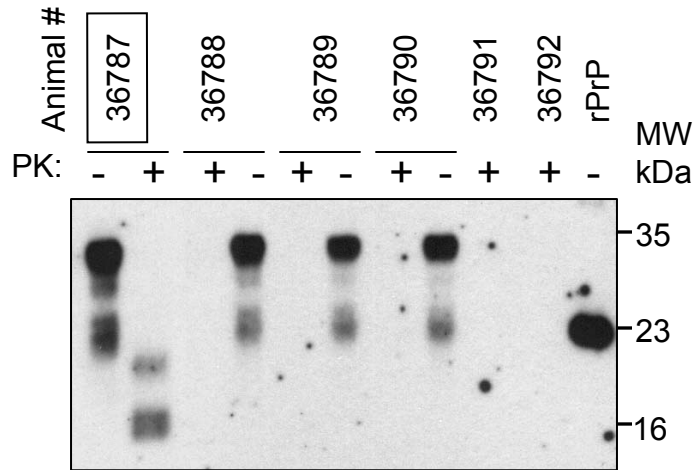

Suppl. Figure 2

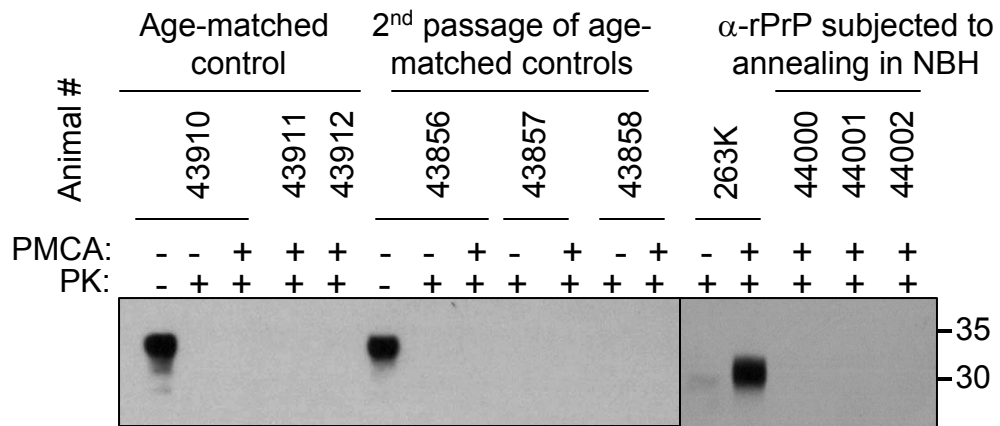

Suppl. Figure 3

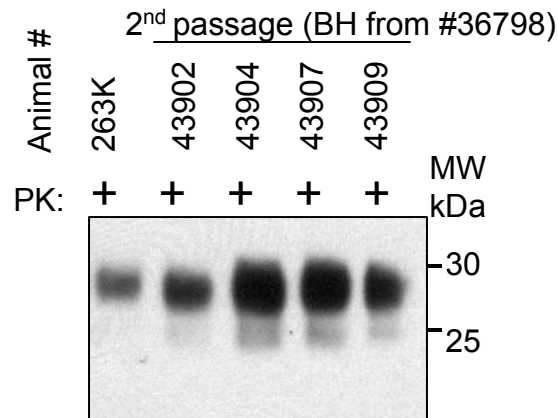

Suppl. Figure 4

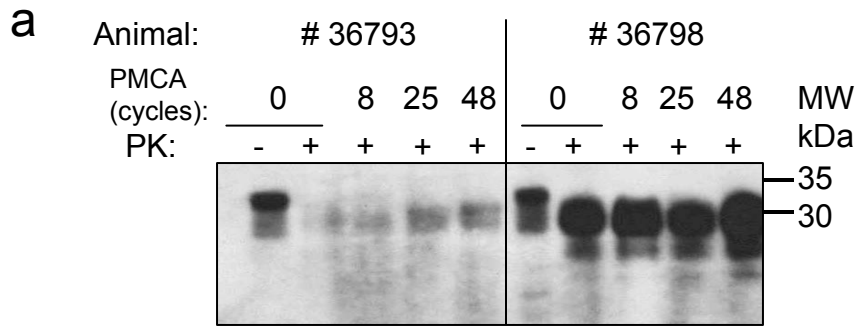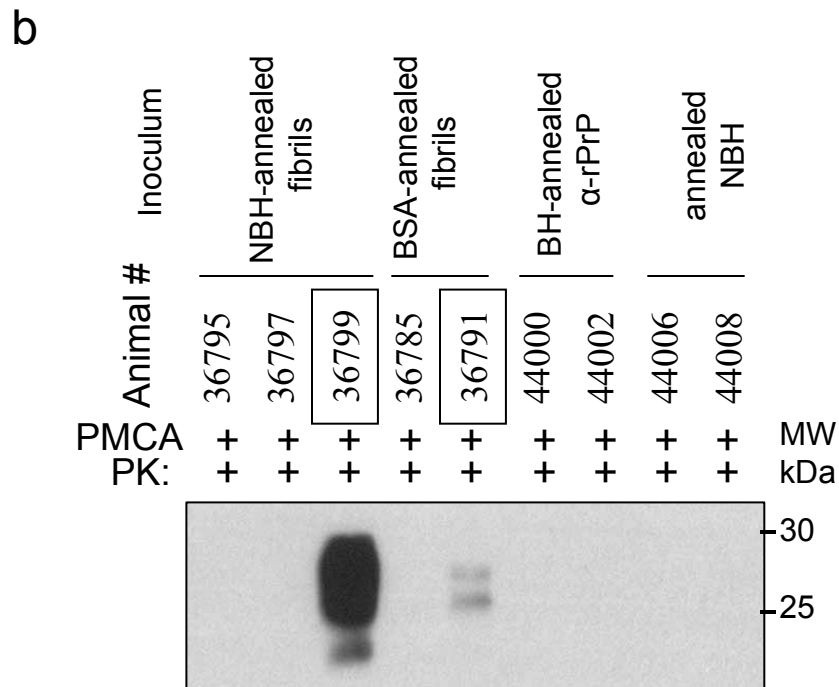

Suppl. Figure 5

a

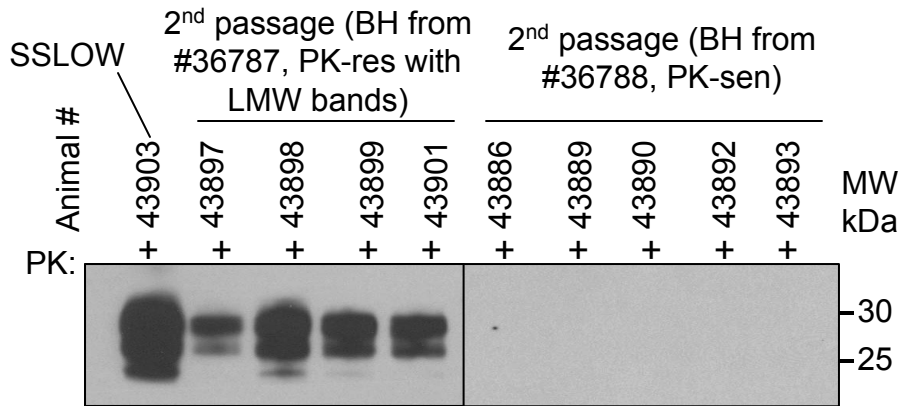

b

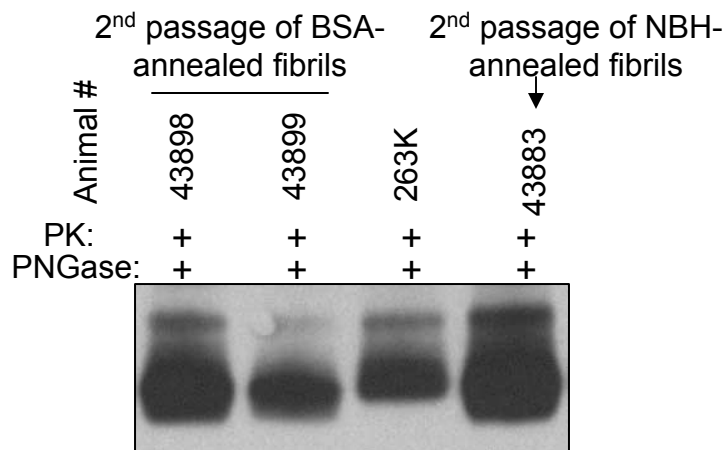

Suppl. Figure 6

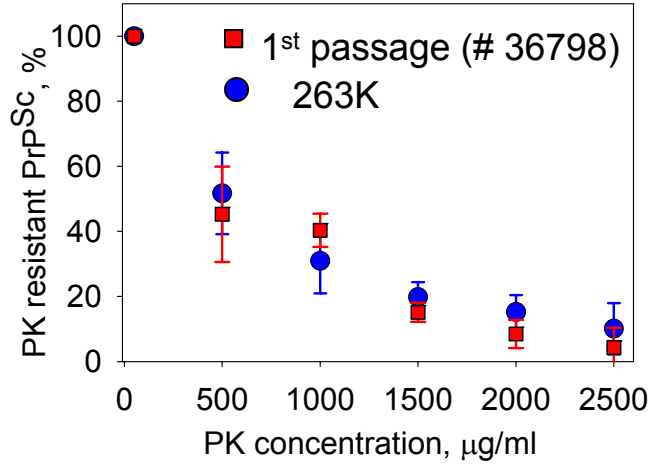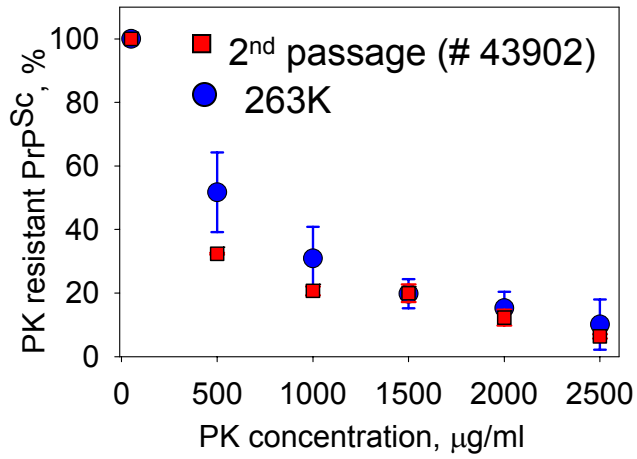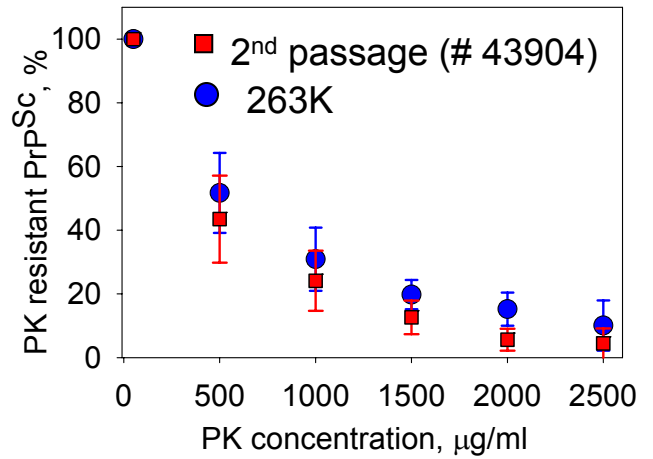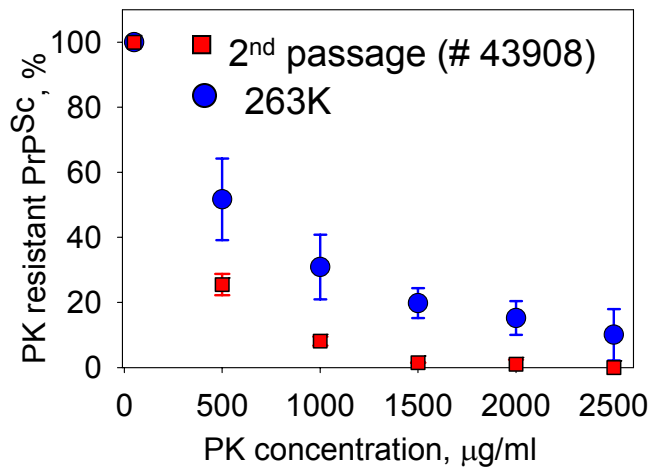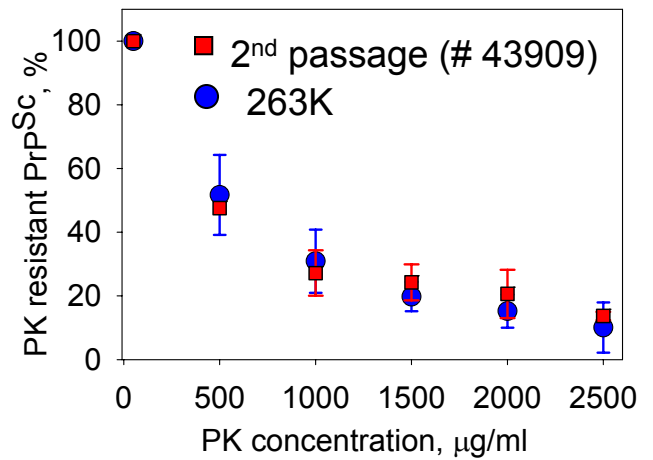

Suppl. Figure 7

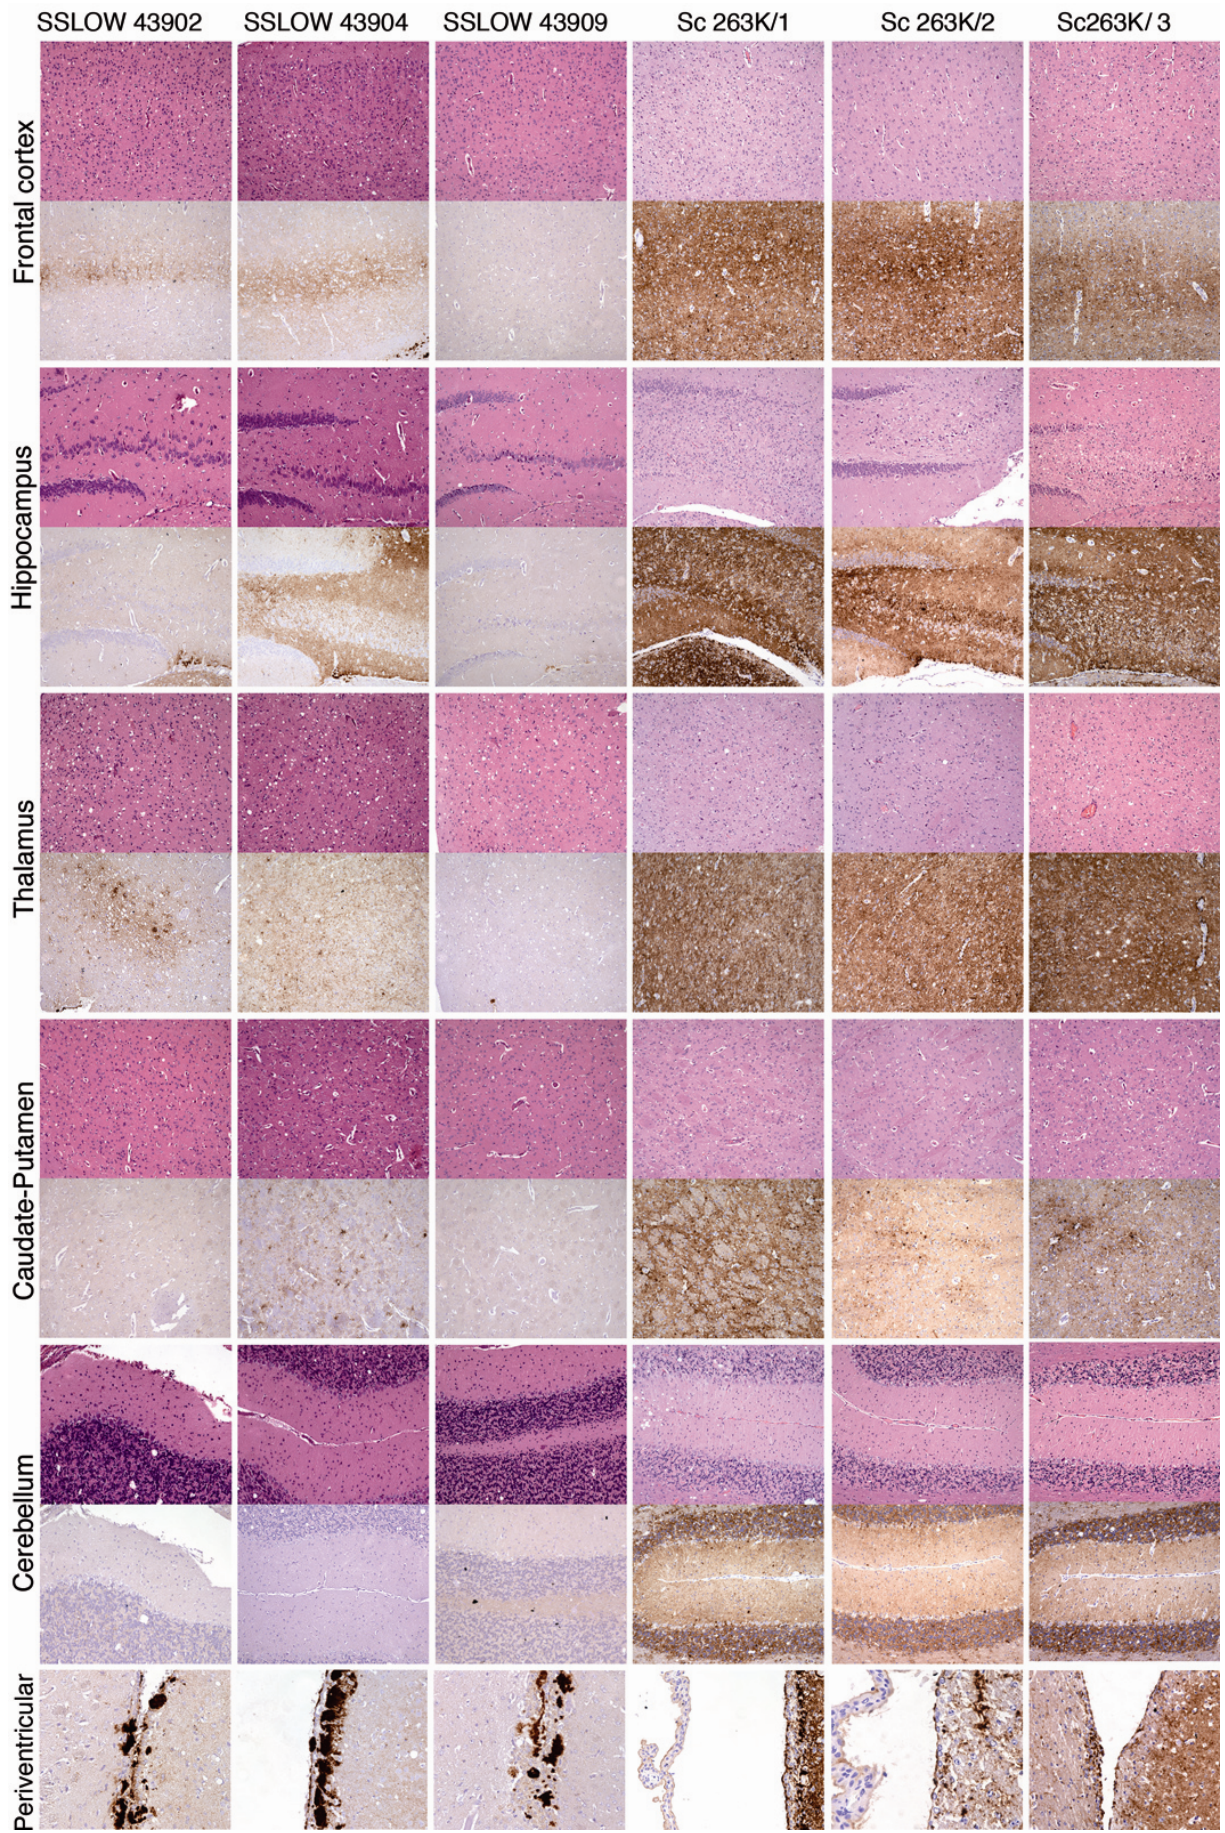

Suppl. Figure 8

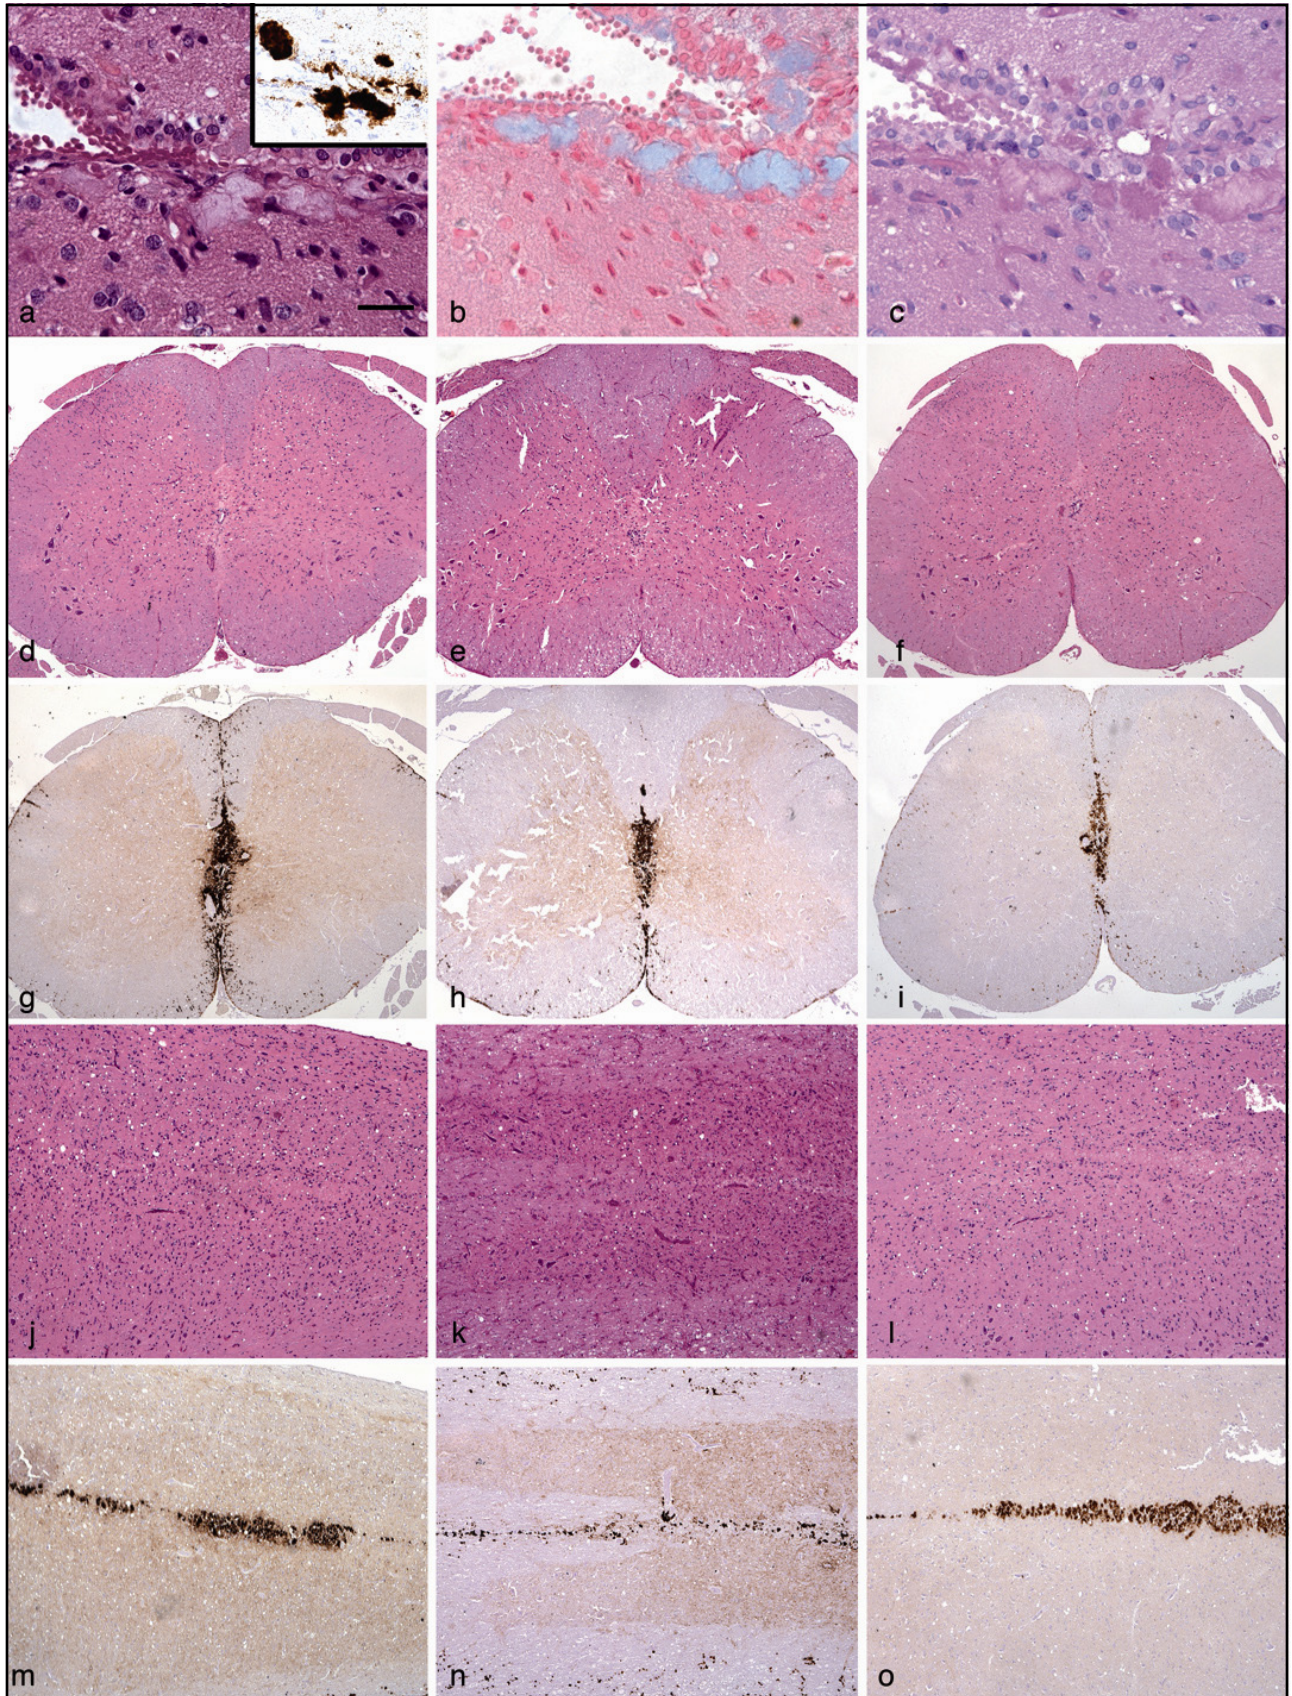

Suppl. Figure 9

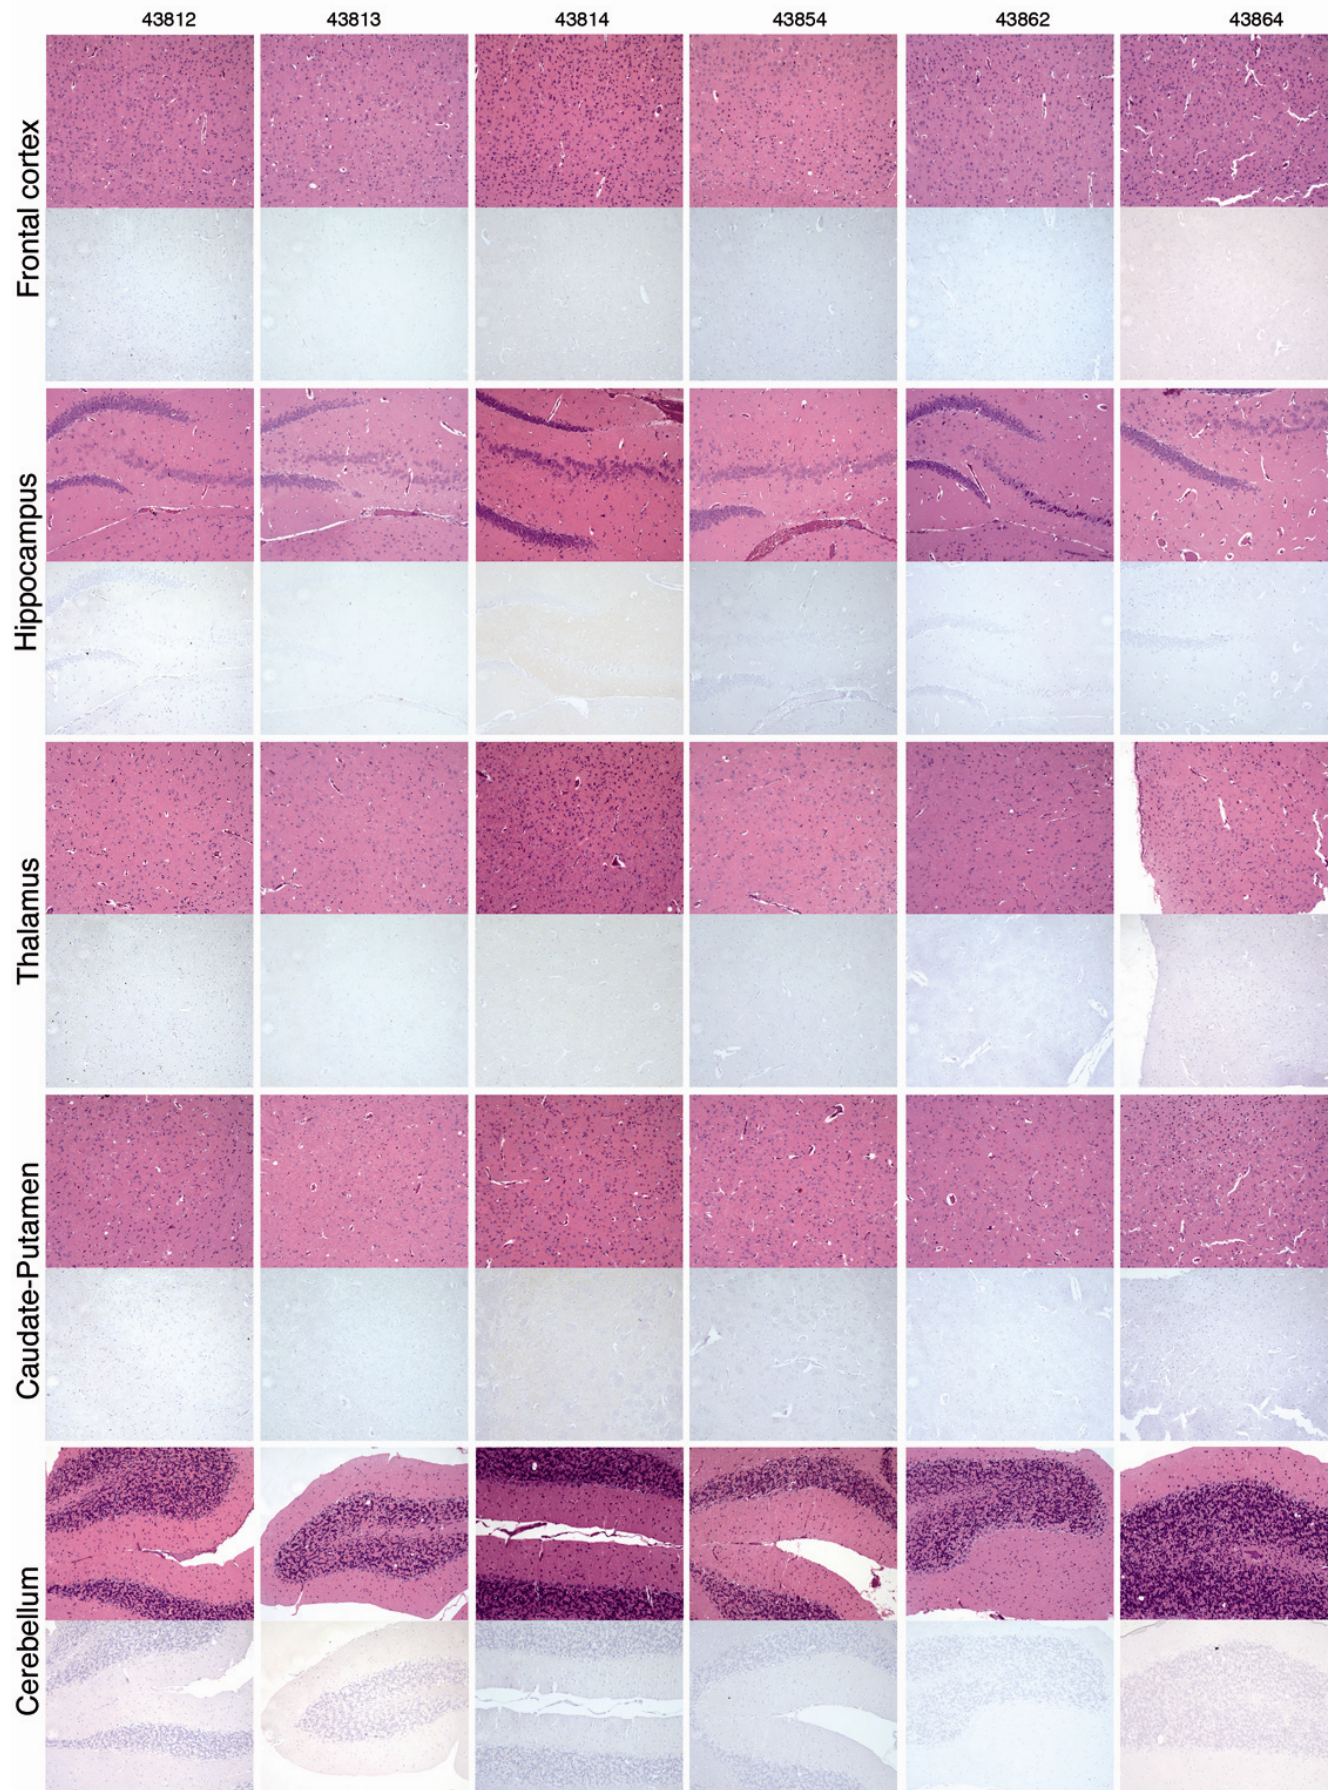

Supplement: 401_2009_633_MOESM2_ESM.pdf [file 401_2009_633_MOESM2_ESM.pdf]
